# Supplementary material for: Microfluidic dual picoinjection based encapsulation of hemoglobin in alginate microcapsules reinforced by a poly(l-lysine)-g-poly(ethylene glycol)
Source: Royal Society of Chemistry journal article supplement (doi:10.1039/d2sm01045c), 2022-11-28
Supplement: d2sm01045c1.pdf [file d2sm01045c1.pdf]

## Supporting Information

### Microfluidic dual picoinjection based encapsulation of hemoglobin in alginate microcapsules reinforced by a poly(l-lysine)-*g*-poly(ethylene glycol)

Husnain Ahmed <sup>a</sup>, Essa Ahsan Khan <sup>b,1</sup> and Bjørn Torger Stokke <sup>a\*</sup>

<sup>a</sup> Biophysics and Medical Technology, Dept. of Physics, NTNU, NO-7491 Trondheim, Norway.

<sup>b</sup> Dept. of Biology, NTNU, Trondheim, Norway.

\* Corresponding author: Email: [bjorn.stokke@ntnu.no](mailto:bjorn.stokke@ntnu.no)

<sup>1</sup> Current affiliation: Dept. of Biotechnology and Food Science, NTNU, Trondheim, Norway.

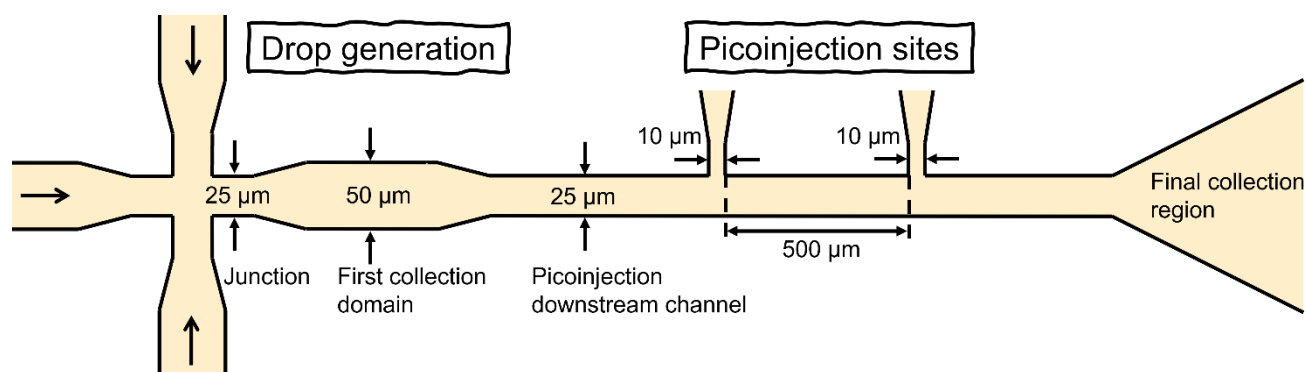

**Fig. S1** A microfluidic chip design used for the synthesis of Hb-alginate-PLL-*g*-PEG beads.

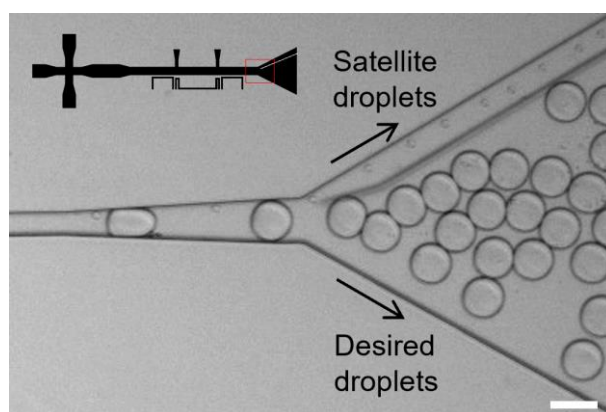

**Fig. S2** Collection outlet of the device demonstrating passive size-dependent separation of the satellite droplets (aqueous Hb-alginate) from the aqueous CaCl<sub>2</sub> droplets containing Hb-alginate-PLL-*g*-PEG beads. Scale bar, 50 μm.
